# Supplementary material
Source: Springer Nature journal article supplement (https://www.springermedizin.de/resource/supplementary/13023_2014_771_MOESM1_ESM.pdf/9643036)

**A**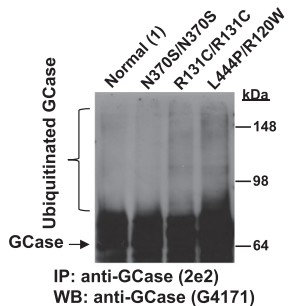**B**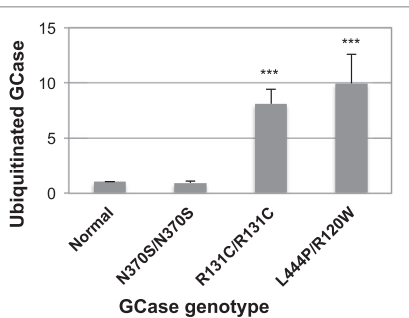**C**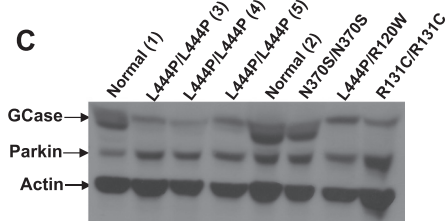**D**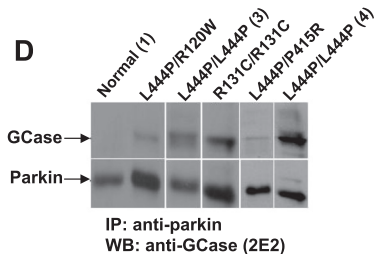**E**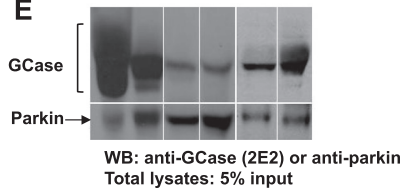

Supplement: MOESM1 [file 9643036]
